1 **Complete sequence of a 641-kb insertion of mitochondrial DNA in the**  
2 ***Arabidopsis thaliana* nuclear genome**

3

4 Peter D. Fields<sup>1,2</sup>, Gus Waneka<sup>1</sup>, Matthew Naish<sup>3</sup>, Michael C. Schatz<sup>4</sup>, Ian R. Henderson<sup>3</sup>, Daniel B.  
5 Sloan<sup>1,\*</sup>

6

7 <sup>1</sup>Department of Biology, Colorado State University, Fort Collins, CO, USA

8 <sup>2</sup>Department of Environmental Sciences, Zoology, University of Basel, Basel, Switzerland

9 <sup>3</sup>Department of Plant Sciences, University of Cambridge, Cambridge, UK

10 <sup>4</sup>Department of Computer Science, Johns Hopkins University, Baltimore, MD, USA

11

12 \*Corresponding author: [dan.sloan@colostate.edu](mailto:dan.sloan@colostate.edu)

13 **ABSTRACT**

14

15 Intracellular transfers of mitochondrial DNA continue to shape nuclear genomes. Chromosome 2 of  
16 the model plant *Arabidopsis thaliana* contains one of the largest known nuclear insertions of  
17 mitochondrial DNA (numts). Estimated at over 600 kb in size, this numt is larger than the entire  
18 *Arabidopsis* mitochondrial genome. The primary *Arabidopsis* nuclear reference genome contains  
19 less than half of the numt because of its structural complexity and repetitiveness. Recent datasets  
20 generated with improved long-read sequencing technologies (PacBio HiFi) provide an opportunity to  
21 finally determine the accurate sequence and structure of this numt. We performed a *de novo*  
22 assembly using sequencing data from recent initiatives to span the *Arabidopsis* centromeres,  
23 producing a gap-free sequence of the Chromosome 2 numt, which is 641-kb in length and has  
24 99.933% nucleotide sequence identity with the actual mitochondrial genome. The numt assembly is  
25 consistent with the repetitive structure previously predicted from fiber-based fluorescent *in situ*  
26 hybridization. Nanopore sequencing data indicate that the numt has high levels of cytosine  
27 methylation, helping to explain its biased spectrum of nucleotide sequence divergence and  
28 supporting previous inferences that it is transcriptionally inactive. The original numt insertion appears  
29 to have involved multiple mitochondrial DNA copies with alternative structures that subsequently  
30 underwent an additional duplication event within the nuclear genome. This work provides insights  
31 into numt evolution, addresses one of the last unresolved regions of the *Arabidopsis* reference  
32 genome, and represents a resource for distinguishing between highly similar numt and mitochondrial  
33 sequences in studies of transcription, epigenetic modifications, and *de novo* mutations.

34

35 **Significance statement:** Nuclear genomes are riddled with insertions of mitochondrial DNA. The  
36 model plant *Arabidopsis* has one of largest of these insertions ever identified, which at over 600-kb  
37 in size represents one of the last unresolved regions in the *Arabidopsis* genome more than 20 years  
38 after the insertion was first identified. This study reports the complete sequence of this region,  
39 providing insights into the origins and subsequent evolution of the mitochondrial DNA insertion and a  
40 resource for distinguishing between the actual mitochondrial genome and this nuclear copy in  
41 functional studies.

42

43 **Key words:** CpG methylation, intracellular gene transfer, numt, nupt, structural variants, tandem  
44 duplications

## 45 INTRODUCTION

46

47 Intracellular DNA transfer from mitochondrial genomes (mitogenomes) into the nucleus is pervasive  
48 and ongoing in eukaryotes (Hazkani-Covo, et al. 2010). These insertions (known as numts) are  
49 usually non-functional and subject to eventual degradation. However, they are of biological interest  
50 as a mutagenic mechanism (Turner, et al. 2003; Hazkani-Covo and Martin 2017) and the ultimate  
51 source of rare functional gene transfers from mitochondria to the nucleus (Timmis, et al. 2004). They  
52 are also of practical concern as a common cause of artifacts and misinterpretation in inferring  
53 phylogenetic relationships (Bensasson, et al. 2001), biparental inheritance of mitogenomes (Lutz-  
54 Bonengel, et al. 2021), and *de novo* mutations (Wu, et al. 2020). Most numts derive from small  
55 fragments of the mitogenome, but some can be large and structurally complex, including frequent  
56 cases where multiple discontinuous regions of mitochondrial DNA (mtDNA) fuse during integration  
57 into the nuclear genome (Portugez, et al. 2018).

58 The initial sequencing of Chromosome 2 in the *Arabidopsis thaliana* genome identified an  
59 extremely large numt, which was assembled to be 270 kb in length and represent approximately  
60 three-quarters of the 368 kb *Arabidopsis* mitochondrial genome (Lin, et al. 1999). However, analysis  
61 with fiber-based fluorescent *in situ* hybridization (fiber-FISH) indicated the assembly of this region  
62 was incomplete and estimated an actual size of 618 kb ( $\pm$  42 kb) for the numt (Stupar, et al. 2001).  
63 This analysis suggested that large regions of repeated sequence were collapsed in the genome  
64 assembly, resulting in the erroneous exclusion of the remaining quarter of the mitogenome content  
65 that was originally inferred to be absent from the numt. Sequence comparisons between the partial  
66 numt and the *Arabidopsis* mitogenome showed high nucleotide sequence identity (99.91%),  
67 suggesting an evolutionarily recent insertion, but no evidence of selection to conserve gene function  
68 in the numt (Huang, et al. 2005).

69 These early analyses of the Chromosome 2 numt were hampered by multiple technical  
70 limitations. It is very difficult with conventional sequencing technologies to accurately assemble  
71 regions with long repeats that maintain high sequence identity among copies. More recent efforts to  
72 generate complete *Arabidopsis* chromosomal assemblies leveraged advances in long-read  
73 sequencing technologies (Naish, et al. 2021; Wang, et al. 2021), including PacBio HiFi, which can  
74 produce reads over 15 kb in length with >99% accuracy. These studies were successful in spanning  
75 highly repetitive centromere regions, and they both extended the coverage of the Chromosome 2  
76 numt. However, these assemblies differed in multiple regions of the genome (Rabanal, et al. 2022),  
77 including major disagreements in the length and nucleotide sequence of this numt. The Col-CEN  
78 (Naish, et al. 2021) and Col-XJTU (Wang, et al. 2021) assemblies reported lengths of 370 kb and  
79 641 kb, respectively, and their alignable regions differed by 109 single-nucleotide variants (SNVs),

80 18 indels, and one 4-bp microinversion even though they were both derived from *Arabidopsis* Col-0  
81 ecotypes.

82 Another limitation in past analyses of this numt is that the original *Arabidopsis* reference  
83 mitogenome (Unseld, et al. 1997) and nuclear genome (*Arabidopsis* Genome Initiative 2000) derive  
84 from different ecotypes (C24 and Col-0, respectively). In addition, the original mitogenome sequence  
85 has hundreds of sequencing errors (Davila, et al. 2011; Sloan, et al. 2018). With the recent  
86 generation of accurate long-read sequencing data for the *Arabidopsis* nuclear genome (Naish, et al.  
87 2021; Wang, et al. 2021) and a reference mitogenome for the Col-0 accession (Sloan, et al. 2018),  
88 there is a renewed opportunity to assemble and analyze this intriguing numt.

89  
90

## 91 RESULTS AND DISCUSSION

92

93 **Structure of the *Arabidopsis* Chromosome 2 numt.** By performing a *de novo* assembly with  
94 hifiasm (Cheng, et al. 2021) of PacBio HiFi reads generated as part of the recent Col-CEN effort to  
95 span the centromeres in the *Arabidopsis* genome (Naish, et al. 2021), we produced a gap-free  
96 contig that covered the entire numt insertion in Chromosome 2 (**Figure 1**). The large numt was  
97 embedded within a 12.6-Mb contig and was consistent in both size (641-kb) and structure with the  
98 recent Col-XJTU genome assembly (Wang, et al. 2021), but it differed considerably in nucleotide  
99 sequence (see below). Our assembly also matched the repeat structure previously inferred from  
100 fiber-FISH and fell within the estimated size range of  $618 \pm 42$  kb from that analysis (Stupar, et al.  
101 2001).

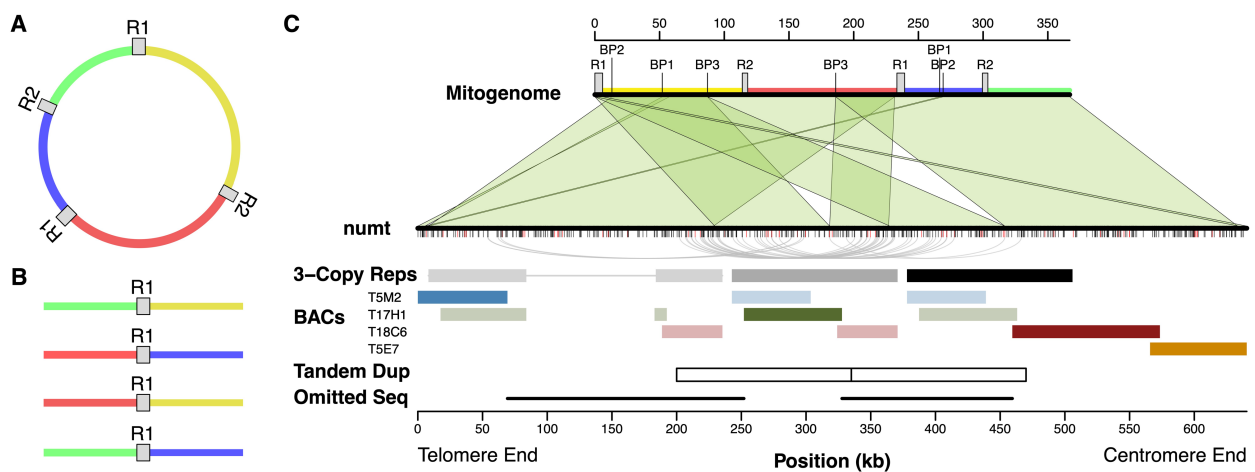

**Figure 1.** Structure of the *Arabidopsis* Chromosome 2 numt. (A) A simplified circular representation of the *Arabidopsis* mitogenome. The sequence from the C24 ecotype was used for structural comparisons with the numt because the Col-0 mitogenome contains rearrangements associated with recombination at small repeats (see main

text). This conformation of the C24 mitogenome corresponds to the previously described D'-A'-C-B structure (Stupar, et al. 2001). R1 and R2 indicate the two large pairs of repeats. Intervening single-copy regions are in different colors, also indicated on the mitogenome map in panel C. (B) Recombination between a pair of repeats in the mitogenome produces four possible alternative combinations of flanking sequences (as shown for R1) which are thought to be present at near equal frequencies in tissue samples. The first three of these conformations are all found within the numt. (C) Structural comparison of the numt and mitogenome. The mitogenome sequence (top) is annotated with the large repeat sequences (R1 and R2) and pairs of breakpoints (BP1, BP2, and BP3) associated with chimeric fusions in the numt that are possibly the result of non-homologous end-joining. Green shaded regions show blocks of syntenic sequence conserved in the numt (bottom). Tick marks below the numt show SNVs (black) and indel/structural variants (red) relative to the Col-0 mitogenome sequence. Some large sections of the mitogenome appear three times in the numt (indicated in shades of gray to black in the 3-Copy Repeats row). The curved gray lines connect pairs of variants where two copies share an allele that differs from the mitogenome and the other repeat copy. The colored blocks show locations of four bacterial artificial chromosomes (BACs) originally used to assemble this genome region. The darker block for each BAC indicates the actual location of that BAC within the numt. The blocks in fainter colors represent repeated sequences similar to the BAC. The adjacent white boxes (Tandem Dup) represent the resulting copies from a putative 135-kb tandem duplication that occurred within the nuclear genome after the numt had already begun to diverge in sequence. The repetitive structure of the numt led to the T17H1 BAC being incorrectly overlapped with the T5M2 and T18C6 BACs in the original *Arabidopsis* genome assembly, resulting in the exclusion of two large regions of intervening sequences (indicated by the black lines in the Omitted Seq row).

102           The assembled numt is considerably larger than the reference *A. thaliana* Col-0 mitogenome  
103 because of extensive sequence duplication, including large tandem repeats. The earlier fiber-FISH  
104 study (Stupar, et al. 2001) concluded that repeat-mediated overlap between bacterial artificial  
105 chromosomes (BACs) used in the original nuclear genome assembly led to the exclusion of a single  
106 large internal region. However, by obtaining the entire numt sequence, we found that the T17H1  
107 BAC does not represent the repeat on the centromere-end of the numt as previously inferred.  
108 Instead, this BAC derives from the middle of three repeat copies in the numt, meaning that two  
109 flanking regions on either side of the T17H1 BAC were omitted from the original assembly (**Figure**  
110 **1c**).

111           The numt also exhibits multiple structural differences relative to the mitogenome, including  
112 rearrangements arising from recombination between two different pairs of small repeats, which are  
113 known as the C and Q repeats and are 457 and 206 bp in length, respectively (Davila, et al. 2011)  
114 (**Figure S1**). Even though the *A. thaliana* nuclear genome sequence derives from the Col-0 ecotype,  
115 the conformations associated with these repeat pairs match the *A. thaliana* C24 mitogenome  
116 (Unseld, et al. 1997). Therefore, the repeat-mediated recombination events that distinguish the Col-0  
117 and C24 mitogenomes likely occurred in the Col-0 mitogenome after the numt insertion, consistent  
118 with the relatively rapid accumulation of these rearrangements in the divergence of mitogenome  
119 structures among *Arabidopsis* ecotypes (Arrieta-Montiel, et al. 2009). However, it is also possible  
120 that occasional outcrossing within this largely selfing species (Platt, et al. 2010) has led to  
121 discordance between the genealogies of the numt and the mitogenome, such that the Col-0 numt is  
122 more closely related to the C24 mitogenome than the Col-0 mitogenome.

123           The *Arabidopsis* mitogenome also contains two pairs of large repeats (6.0 and 4.2 kb in  
124 size). In plant mitogenomes, repeats of this size undergo near-constant recombination such that they  
125 are present in multiple alternative structures, even within tissue samples (Gualberto and Newton  
126 2017). Three of the four possible alternative conformations associated with the “Repeat 1” pair are  
127 found in the numt, meaning that the same flanking sequence can have two different connections on  
128 the other side of the repeat (**Figure 1**). We infer that these alternative structures result from the  
129 direct transfer of multiple copies from the mitogenome. Although it is possible that rearrangements  
130 generated them within the nucleus after insertion, the fact that the alternative structures already exist  
131 at high frequencies within the mitochondria makes direct transfer a much more likely explanation.  
132 Therefore, some of the repetitiveness of this complex numt appears to result from the original  
133 transfer. Mitogenomes are known to exist in complex structures, including multimeric forms (Bendich  
134 1993), so it is possible that a single transferred molecule could have contained multiple copies of  
135 some regions, including these alternative structures. However, complex numts commonly arise via  
136 fusion of multiple DNA fragments (Portugez, et al. 2018), so it is also possible that the alternative  
137 structures were present in distinct DNA fragments that fused at the time of insertion.

138           Although most of the numt shows conserved synteny with the reference mitogenome or can  
139 be explained by repeat-mediated recombination events (see above), there are also structural  
140 rearrangements with breakpoints that appear to result from non-homologous end joining (NHEJ).  
141 The first 8 kb of sequence at the telomere-end of the numt consists of two fragments from disparate  
142 parts of the mitogenome that appear to result from fusion events (BP1 and BP2 in **Figure 1c**). In  
143 addition, there is an internal breakpoint in the numt that is not associated with repeat sequences in  
144 the mitogenome (BP3 in **Figure 1c**). This novel fusion is duplicated within the numt as part of a large  
145 tandem repeat structure. As discussed below, the patterns of sequence divergence among these  
146 repeats provide insight into the further expansion of the numt after its original insertion.

147

148 ***History of nucleotide sequence divergence in the Arabidopsis Chromosome 2 numt.*** Even  
149 though the structure and length of our numt assembly generally match the corresponding regions in  
150 the recent Col-XJTU assembly, the two assemblies differ substantially in sequence. Most notably,  
151 the Col-XJTU numt sequence has 260 SNVs relative to our assembly (**Table S1**). In every one of  
152 these cases, the Col-XJTU variant matches the Col-0 mitogenome even in the large regions of the  
153 assembly where BACs provide independent validation of our basecalls (**Figure 1**). Therefore, large  
154 portions of the Col-XJTU numt assembly appear to have been “overwritten” by the more-abundant  
155 reads derived from the highly similar mitogenome sequence. To further investigate the sequence  
156 discrepancies with the Col-XJTU assembly, we performed a *de novo* assembly of the Col-XJTU HiFi  
157 reads, which generated a near-identical sequence (differing by only 5 SNVs) to our *de novo*  
158 assembly of the Col-CEN HiFi reads. Read mapping indicated that these SNVs reflect true

159 differences between the samples used for Col-CEN and Col-XJTU projects (**Table S2**). Accordingly,  
160 the Col-XJTU project identified >1000 sequence variants and/or errors genome-wide (Wang, et al.  
161 2021), suggesting some divergence among the sequenced Col-0 lines.

162 By comparing the numt to the reference Col-0 mitogenome, we found that they were  
163 99.933% identical in nucleotide sequence (after excluding indels, multinucleotide variants, and short  
164 unalignable sequences adjacent to indel regions). This level of sequence identity is even higher than  
165 a previously reported value of 99.91% (Huang, et al. 2005), which is not surprising because that  
166 study was based on only a portion of the numt and a C24 mitogenome reference that was since  
167 found to contain numerous sequencing errors. The SNVs that distinguish the numt and the  
168 mitogenome are dominated by transitions with GC base-pairs in the mitogenome and AT base-pairs  
169 in the numt (**Tables 1 and S3**). This signature likely reflects the much higher rate of mutation in the  
170 nuclear genome than the mitogenome (Wolfe, et al. 1987; Drouin, et al. 2008) and the biased  
171 mutation spectrum in the nucleus (Ossowski, et al. 2010; Weng, et al. 2019). SNV transitions  
172 showed a bias of 6.7 to 1 towards AT base-pairs in the numt. This bias is approximately twice as  
173 strong as previously reported (Huang, et al. 2005), indicating that our improved numt assembly and  
174 a higher quality mitogenome reference have substantially reduced noise. The sequence divergence  
175 between the numt and the mitogenome also showed evidence of a deletion bias in the nuclear  
176 genome (Weng, et al. 2019), as more than two-thirds of the indels that distinguished the two  
177 genomes had the shorter allele in the numt (**Table 1**).

**Table 1.** Sequence variants distinguishing the *Arabidopsis* Chromosome 2 numt from the Col-0 reference mitogenome sequence

| Variant                                     | Count      |
|---------------------------------------------|------------|
| <b>Total SNVs (Mitogenome&lt;-&gt;numt)</b> | <b>425</b> |
| <b>Total Transitions</b>                    | <b>270</b> |
| GC<->AT                                     | 235        |
| AT<->GC                                     | 35         |
| <b>Total Transversions</b>                  | <b>155</b> |
| GC<->TA                                     | 58         |
| AT<->CG                                     | 30         |
| GC<->CG                                     | 42         |
| AT<->TA                                     | 25         |
| <b>Total Indels</b>                         | <b>44</b>  |
| numt shorter                                | 30         |
| numt longer                                 | 14         |

178 The C→T transitions that dominate the numt mutation spectrum are a hallmark of the  
179 abundant 5-methylcytosine (5mC) modifications at CpG and CHG sites in plant nuclear genomes  
180 (Vanyushin and Ashapkin 2011; Weng, et al. 2019; Naish, et al. 2021; Monroe, et al. 2022). We  
181 found that 88 of the 235 C→T observed SNVs occur at CpG sites, and an additional 87 occur at  
182 CHG sites. This total of 74.5% (175 of 235) represents a highly significant enrichment relative to the

183 33.3% of all cytosines in the mitogenome that are found in a CpG or CHG context ( $\chi^2 = 178.9$ ;  $p <$   
184 0.0001), supporting the expected role of 5mC modifications in numt sequence divergence.  
185 Furthermore, using previously generated nanopore sequencing data (Naish, et al. 2021), we found  
186 high levels of 5mC modifications across the full-length of the numt, consistent with observations for  
187 pericentromeric regions in the rest of the *Arabidopsis* genome (**Figure 2**). This high level of  
188 methylation supports previous conclusions that the numt is likely to be transcriptionally inactive  
189 (Huang, et al. 2005; Adamo, et al. 2008).

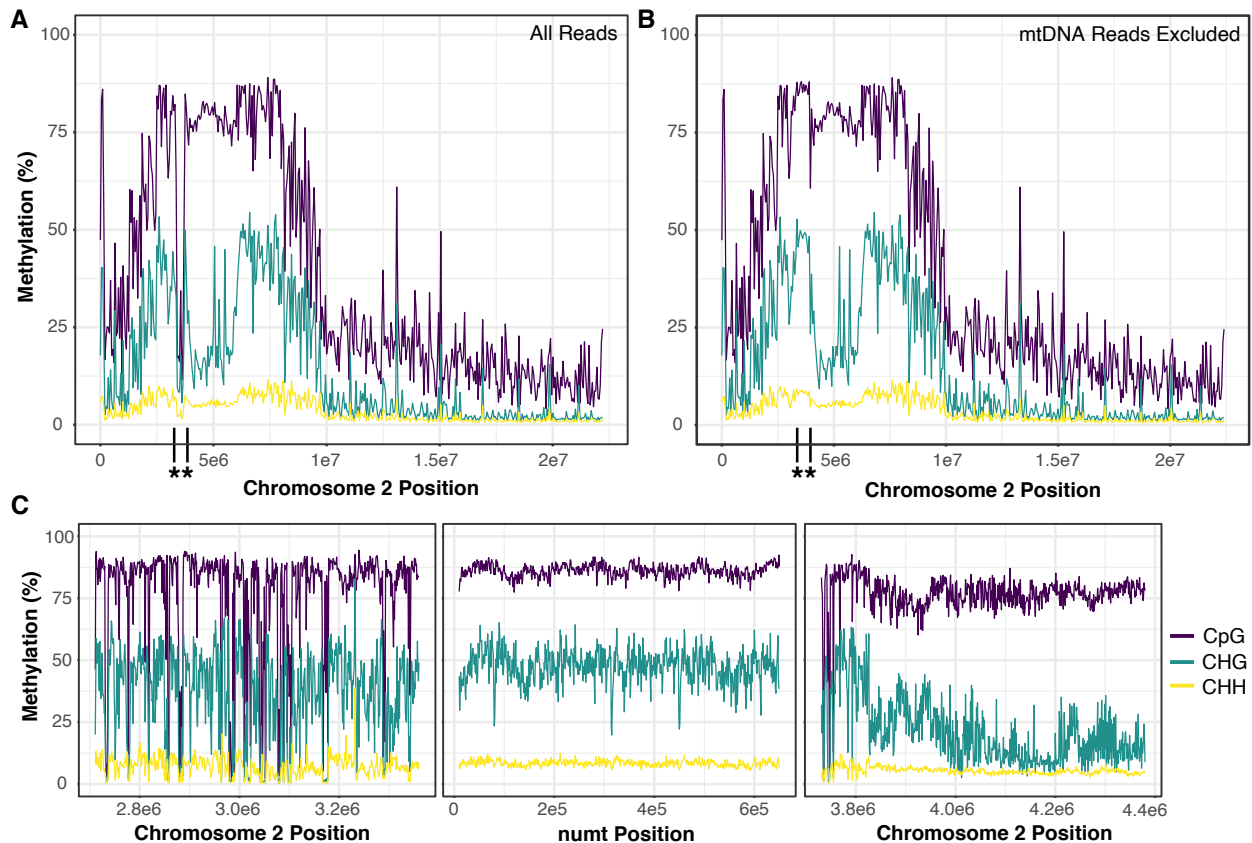

**Figure 2.** Nanopore-derived estimates of methylation percentage across Chromosome 2 of the Col-CEN assembly (after updating it to include the full numt) in CpG (purple), CHG (teal) and CHH (yellow) contexts. (A) Methylation profile including all reads (>30 kb) averaged over 50-kb windows. The boundaries of the numt region are indicated with asterisks and vertical black lines on the x-axis. (B) The same profile after excluding mitogenome-derived reads based on SNVs that distinguish the numt and mitogenome, which greatly increases the estimated methylation levels in the numt because of the lack of methylation in the actual mitogenome. (C) Methylation profile of 650 kb on the telomere side of the numt (left) across the numt (middle) and 650 kb on the centromere side of the numt (right) averaged over 1-kb windows.

190 The repetitive structure in the numt raises the possibility of a large duplication that occurred  
191 during the initial insertion event or one that occurred within the nuclear genome post-insertion. We  
192 reasoned that patterns of sequence divergence could differentiate between these alternative models



193 (Hazkani-Covo, et al. 2003). If duplicates were generated at the time of insertion, all copies will have  
194 started diverging simultaneously and form a “star phylogeny”. In contrast, later duplications within  
195 the nucleus after sequence divergence had already begun would lead to descendent copies sharing  
196 derived variants with each other. Therefore, we compared sequence divergence among the large  
197 repeat regions present in three copies in the numt (**Figure 1c**) and the homologous mitogenome  
198 sequence. We found a higher average pairwise divergence between repeats within the numt  
199 (0.095%) than between those sequences and the reference mitogenome (0.065%). Again, this is  
200 consistent with a higher mutation rate in the nucleus than in the mitogenome. We identified 34  
201 variants for which one of the three copies in the numt matched the mitogenome reference and the  
202 other two shared an alternative allele (**Figure 1c, Table S4**). Given the extremely low rate of  
203 sequence divergence between repeats, these patterns of shared alleles are highly unlikely to arise  
204 by independent mutations (i.e., homoplasy). Instead, they suggest a duplication after nucleotide  
205 sequence divergence had already started to occur following the initial numt insertion.

206 Most of these shared variants occurred in a consistent fashion, supporting tandem  
207 duplication of a 135-kb sequence, with a central breakpoint at ~335 kb from the telomere end of the  
208 repeat (**Figure 1c**). However, a cluster of four variants shows a conflicting pattern, linking the  
209 internal duplicated region with repeated sequence content at the far telomere end of the numt  
210 (**Figure 1c**). These pairings are more difficult to interpret but could reflect a history of localized gene  
211 conversion after repeat copies began to diverge. Comparing the divergence of this numt sequence  
212 among closely related *A. thaliana* ecotypes may help further tease apart the effects and timing of  
213 gene conversion and duplication events.

214 In summary, the accuracy of PacBio HiFi technology can resolve extremely complex genome  
215 structures consisting of long repeats that share highly similar (but non-identical) sequences.  
216 *Arabidopsis* is the pre-eminent model system in plant genetics, so obtaining complete and accurate  
217 genomic resources is of utmost importance. The original *Arabidopsis* genome assembly (conducted  
218 more than two decades ago; Arabidopsis Genome Initiative 2000) and recent efforts to close the  
219 remaining centromere-based gaps (Naish, et al. 2021; Wang, et al. 2021) represent major landmarks  
220 in that process. The resulting PacBio HiFi sequencing data have allowed us to address one of the  
221 last remaining unresolved regions in the genome assembly. To our knowledge, this represents the  
222 largest numt ever sequenced. Large numt tandem arrays have recently been identified in humans  
223 and can reach similar sizes (Lutz-Bonengel, et al. 2021), but they have yet to be sequenced. Smaller  
224 numt fragments have also undergone massive proliferation into large tandem arrays in legumes  
225 (Choi, et al. 2022). Insertions of near-complete genomes of plastids and other bacterial  
226 endosymbionts have also been observed (Huang, et al. 2005; Dunning Hotopp, et al. 2007).  
227 Therefore, these large insertions are likely common elements of eukaryotic genomes that are

228 frequently overlooked because of challenges associated with assembling regions with such high  
229 similarity to organelle/endosymbiont genomes.

230 Numts are a source of fascination because of their biological importance but also frustration  
231 as a source of artifacts in genetic studies. In addition to providing insights into the origins and  
232 evolution of this extremely large and complex numt, a complete sequence of this region is of  
233 practical value for distinguishing between the numt and true mtDNA in studies investigating  
234 molecular processes such as *de novo* mutation, transcriptional activity, and epigenetic modifications.  
235 The similarity of the numt and mitogenome will still pose challenges (especially for short-read  
236 sequencing technologies) because stretches of thousands of base-pairs remain 100% identical  
237 between the numt and the mitogenome, but the set of reliable variants (**Figure 1, Table S3**) provides  
238 a foothold for distinguishing molecular processes associated with these highly similar sequences.

239

## 240 **METHODS**

241

242 ***De novo genome assembly.*** To generate a *de novo* assembly of the numt region, we used the full  
243 set of PacBio HiFi reads (circular consensus sequences) from Naish et al. 2021, which were  
244 accessed via the European Nucleotide Archive (accession number PRJEB46164) on Nov. 18, 2021.  
245 We used the hifiasm v. 0.15.1-r334 assembler (Cheng, et al. 2021), which was developed for the  
246 specific purpose of assembling long, highly accurate reads such as those from PacBio HiFi  
247 sequencing. Because the focal genotype is highly inbred, we included the '-l0' flag as part of the  
248 assembler configuration, thereby disabling automatic duplication purging. The resultant assembly  
249 graph was converted to a set of contigs in a multi-fasta format using AWK (Aho et al. 1988) as  
250 described at <https://github.com/chhylp123/hifiasm>. To identify the numt region in the resulting contigs  
251 we used a local BLAST database (Altschul et al. 1990) and a query composed of the previous,  
252 partial assembly of the *A. thaliana* numt sequence. We later repeated these assembly methods with  
253 an independent PacBio HiFi dataset (Wang, et al. 2021), accessed via the Genome Warehouse in  
254 the National Genomics Data Center, Beijing Institute of Genomics, Chinese Academy of Science /  
255 China National Center for Bioinformation (BioProject PRJCA005809) on Nov. 28, 2021. The  
256 structural accuracy of the assembly was validated using multiple orthogonal approaches, including  
257 alignment consistency of published Illumina, PacBio HiFi, and nanopore reads mapped to the  
258 assembled sequences (Naish, et al. 2021; Wang, et al. 2021), consistency with the published BAC  
259 sequences (Lin, et al. 1999), consistency with published fiber-FISH results (Stupar, et al. 2001), and  
260 consistency with published BioNano optical mapping data (Naish, et al. 2021).

261

262 ***Comparative sequence analysis.*** EMBOSS Stretcher

263 ([https://www.ebi.ac.uk/Tools/psa/emboss\\_stretcher/](https://www.ebi.ac.uk/Tools/psa/emboss_stretcher/)) was used to generate global pairwise

264 alignments between different assemblies of the numt region. In addition, this aligner was used to  
265 compare our assembly to a manually generated rearrangement of the Col-0 mitogenome (GenBank  
266 accession NC\_037304.1), for which homologous regions of the mitogenome were concatenated to  
267 match the synteny of the numt. Multiple sequence alignments of the large repeats in the numt  
268 (**Figure 1c**) and homologous mitogenome sequence were generated with MAFFT v7.453 under  
269 default parameters. Variants in aligned sequences were identified and quantified with custom Perl  
270 scripts. Sequence variants and structural comparisons between the numt, mitogenome, and BACs  
271 from the original *Arabidopsis* genome project were visualized with a custom script run in R v4.0.5.

272 We assessed the quality of basecalls in the *de novo* numt assembly with local BLAST  
273 alignments of the assembly against the numt derived BACs from the original *Arabidopsis* genome  
274 assembly and identified 7 SNVs distinguishing the *de novo* assembly and the BACs (**Table S5**). To  
275 validate these 7 SNVs, we aligned the HiFi reads to the *de novo* numt assembly using minimap2 v.  
276 2.22 (Li 2018) and manually inspected the alignments using IGV (Thorvaldsdóttir, et al. 2013). For all  
277 7 SNVs, the HiFi reads unanimously supported the allele in the *de novo* numt assembly. We also  
278 used the mapped HiFi reads to manually confirm support for 5 observed SNVs that distinguished our  
279 *de novo* assemblies of the Col-CEN and Col-XJTU HiFi reads (**Table S2**).

280

281 **Cytosine methylation analysis.** Previously published nanopore reads (Naish, et al. 2021) were  
282 filtered for length (>30kb) using Flitlong (--min\_mean\_q 95, --min\_length 30000;  
283 <https://github.com/rrwick/Flitlong>) and aligned to our *de novo* Col-CEN numt assembly and the  
284 reference Col-0 mitogenome using Winnowmap v1.11, -ax map-ont) (Jain, et al. 2020). Alignments  
285 were filtered for those containing the numt allele at each SNV position (**Table S3**) using SplitSNP  
286 (<https://github.com/astatham/splitSNP>). Bam files were merged using Samtools v1.9 and read IDs  
287 were extracted and filtered to retain only duplicate IDs (>2). The resulting readset was used for  
288 methylation calling against the numt assembly with DeepSignal-plant v0.14 (Ni, et al. 2021). Whole-  
289 chromosome methylation analysis was performed with the full 30-kb dataset and with the dataset  
290 generated by removing reads containing mitogenome alleles.

291

292 **Data and code availability.** All scripts are available via  
293 [https://github.com/dbsloan/arabidopsis\\_numt](https://github.com/dbsloan/arabidopsis_numt). Alignments and numt sequences are available via  
294 <https://zenodo.org/record/6168939>.

295

296

297 **ACKNOWLEDGEMENTS**

298 This work was supported by grants from the National Institutes of Health (R01 GM118046) to D.B.S.,  
299 the Human Frontier Science Program (RGP0025/2021) to M.C.S. and I.R.H., and the Biotechnology  
300 and Biological Sciences Research Council (BB/V003984/1) to I.R.H.

## REFERENCES

- Adamo A, Pinney JW, Kunova A, Westhead DR, Meyer P. 2008. Heat stress enhances the accumulation of polyadenylated mitochondrial transcripts in *Arabidopsis thaliana*. *PLoS one* 3:e2889.
- Arabidopsis Genome Initiative. 2000. Analysis of the genome sequence of the flowering plant *Arabidopsis thaliana*. *Nature* 408:796-815.
- Arrieta-Montiel MP, Shedge V, Davila J, Christensen AC, Mackenzie SA. 2009. Diversity of the *Arabidopsis* mitochondrial genome occurs via nuclear-controlled recombination activity. *Genetics* 183:1261-1268.
- Bendich AJ. 1993. Reaching for the ring: the study of mitochondrial genome structure. *Current genetics* 24:279-290.
- Bensasson D, Zhang D, Hartl DL, Hewitt GM. 2001. Mitochondrial pseudogenes: evolution's misplaced witnesses. *Trends in Ecology & Evolution* 16:314-321.
- Cheng H, Concepcion GT, Feng X, Zhang H, Li H. 2021. Haplotype-resolved de novo assembly using phased assembly graphs with hifiasm. *Nature Methods* 18:170-175.
- Choi IS, Wojciechowski MF, Steele KP, Hunter SG, Ruhlman TA, Jansen RK. 2022. Born in the mitochondrion and raised in the nucleus: Evolution of a novel tandem repeat family in *Medicago polymorpha* (Fabaceae). *Plant Journal* In Press.
- Davila JI, Arrieta-Montiel MP, Wamboldt Y, Cao J, Hagmann J, Shedge V, Xu YZ, Weigel D, Mackenzie SA. 2011. Double-strand break repair processes drive evolution of the mitochondrial genome in *Arabidopsis*. *BMC biology* 9:64.
- Drouin G, Daoud H, Xia J. 2008. Relative rates of synonymous substitutions in the mitochondrial, chloroplast and nuclear genomes of seed plants. *Molecular phylogenetics and evolution* 49:827-831.
- Dunning Hotopp JC, Clark ME, Oliveira DC, Foster JM, Fischer P, Munoz Torres MC, Giebel JD, Kumar N, Ishmael N, Wang S, et al. 2007. Widespread lateral gene transfer from intracellular bacteria to multicellular eukaryotes. *Science (New York, N.Y.)* 317:1753-1756.
- Gualberto JM, Newton KJ. 2017. Plant mitochondrial genomes: dynamics and mechanisms of mutation. *Annual Review of Plant Biology* 68:225-252.
- Hazkani-Covo E, Martin WF. 2017. Quantifying the number of independent organelle DNA insertions in genome evolution and human health. *Genome Biology and Evolution* 9:1190-1203.
- Hazkani-Covo E, Sorek R, Graur D. 2003. Evolutionary dynamics of large numts in the human genome: rarity of independent insertions and abundance of post-insertion duplications. *Journal of Molecular Evolution* 56:169-174.
- Hazkani-Covo E, Zeller RM, Martin W. 2010. Molecular poltergeists: mitochondrial DNA copies (numts) in sequenced nuclear genomes. *PLoS Genetics* 6:e1000834.

Huang CY, Grunheit N, Ahmadinejad N, Timmis JN, Martin W. 2005. Mutational decay and age of chloroplast and mitochondrial genomes transferred recently to angiosperm nuclear chromosomes. *Plant Physiology* 138:1723-1733.

Jain C, Rhie A, Zhang H, Chu C, Walenz BP, Koren S, Phillippy AM. 2020. Weighted minimizer sampling improves long read mapping. *Bioinformatics* 36:i111-i118.

Krumsiek J, Arnold R, Rattei T. 2007. Gepard: a rapid and sensitive tool for creating dotplots on genome scale. *Bioinformatics (Oxford, England)* 23:1026-1028.

Li H. 2018. Minimap2: pairwise alignment for nucleotide sequences. *Bioinformatics* 34:3094-3100.

Lin X, Kaul S, Rounsley S, Shea TP, Benito MI, Town CD, Fujii CY, Mason T, Bowman CL, Barnstead M. 1999. Sequence and analysis of chromosome 2 of the plant *Arabidopsis thaliana*. *Nature* 402:761-768.

Lutz-Bonengel S, Niederstätter H, Naue J, Koziel R, Yang F, Sängler T, Huber G, Berger C, Pflugradt R, Strobl C. 2021. Evidence for multi-copy Mega-NUMTs in the human genome. *Nucleic Acids Research* 49:1517-1531.

Monroe JG, Srikant T, Carbonell-Bejerano P, Becker C, Lensink M, Exposito-Alonso M, Klein M, Hildebrandt J, Neumann M, Kliebenstein D. 2022. Mutation bias reflects natural selection in *Arabidopsis thaliana*. *Nature In Press*.

Naish M, Alonge M, Wlodzimierz P, Tock AJ, Abramson BW, Schmücker A, Mandáková T, Jamge B, Lambing C, Kuo P. 2021. The genetic and epigenetic landscape of the *Arabidopsis* centromeres. *Science* 374:eabi7489.

Ni P, Huang N, Nie F, Zhang J, Zhang Z, Wu B, Bai L, Liu W, Xiao C-L, Luo F. 2021. Genome-wide detection of cytosine methylations in plant from Nanopore data using deep learning. *Nature Communications* 12:5976.

Ossowski S, Schneeberger K, Lucas-Lledo JI, Warthmann N, Clark RM, Shaw RG, Weigel D, Lynch M. 2010. The rate and molecular spectrum of spontaneous mutations in *Arabidopsis thaliana*. *Science* 327:92-94.

Platt A, Horton M, Huang YS, Li Y, Anastasio AE, Mulyati NW, Ågren J, Bossdorf O, Byers D, Donohue K. 2010. The scale of population structure in *Arabidopsis thaliana*. *PLoS Genetics* 6:e1000843.

Portugez S, Martin WF, Hazkani-Covo E. 2018. Mosaic mitochondrial-plastid insertions into the nuclear genome show evidence of both non-homologous end joining and homologous recombination. *BMC Evolutionary Biology* 18:162.

Rabanal FA, Graeff M, Lanz C, Fritschi K, Llaca V, Lang ML, Carbonell-Bejerano P, Henderson I, Weigel D. 2022. Pushing the limits of HiFi assemblies reveals centromere diversity between two *Arabidopsis thaliana* genomes. *bioRxiv:2022.2002.2015.480579*.

Sloan DB, Wu Z, Sharbrough J. 2018. Correction of persistent errors in *Arabidopsis* reference mitochondrial genomes. *Plant Cell* 30:525-527.

Stupar RM, Lilly JW, Town CD, Cheng Z, Kaul S, Buell CR, Jiang J. 2001. Complex mtDNA constitutes an approximate 620-kb insertion on *Arabidopsis thaliana* chromosome 2: implication of potential sequencing errors caused by large-unit repeats. *Proceedings of the National Academy of Sciences of the United States of America* 98:5099-5103.

Thorvaldsdóttir H, Robinson JT, Mesirov JP. 2013. Integrative Genomics Viewer (IGV): high-performance genomics data visualization and exploration. *Briefings in Bioinformatics* 14:178-192.

Timmis JN, Ayliffe MA, Huang CY, Martin W. 2004. Endosymbiotic gene transfer: Organelle genomes forge eukaryotic chromosomes. *Nature Review Genetics* 5:123-135.

Turner C, Killoran C, Thomas NS, Rosenberg M, Chuzhanova NA, Johnston J, Kemel Y, Cooper DN, Biesecker LG. 2003. Human genetic disease caused by de novo mitochondrial-nuclear DNA transfer. *Human Genetics* 112:303-309.

Unselid M, Marienfeld JR, Brandt P, Brennicke A. 1997. The mitochondrial genome of *Arabidopsis thaliana* contains 57 genes in 366, 924 nucleotides. *Nature genetics* 15:57-61.

Vanyushin BF, Ashapkin VV. 2011. DNA methylation in higher plants: past, present and future. *Biochimica et Biophysica Acta (BBA)-Gene Regulatory Mechanisms* 1809:360-368.

Wang B, Yang X, Jia Y, Xu Y, Jia P, Dang N, Wang S, Xu T, Zhao X, Gao S. 2021. High-quality *Arabidopsis thaliana* genome assembly with Nanopore and HiFi long reads. *Genomics, proteomics & bioinformatics*.

Weng M-L, Becker C, Hildebrandt J, Neumann M, Rutter MT, Shaw RG, Weigel D, Fenster CB. 2019. Fine-grained analysis of spontaneous mutation spectrum and frequency in *Arabidopsis thaliana*. *Genetics* 211:703-714.

Wolfe KH, Li WH, Sharp PM. 1987. Rates of nucleotide substitution vary greatly among plant mitochondrial, chloroplast, and nuclear DNAs. *Proceedings of the National Academy of Sciences* 84:9054-9058.

Wu Z, Waneka G, Broz AK, King CR, Sloan DB. 2020. MSH1 is required for maintenance of the low mutation rates in plant mitochondrial and plastid genomes. *Proceedings of the National Academy of Sciences* 117:16448-16455.

## SUPPLEMENTAL MATERIAL

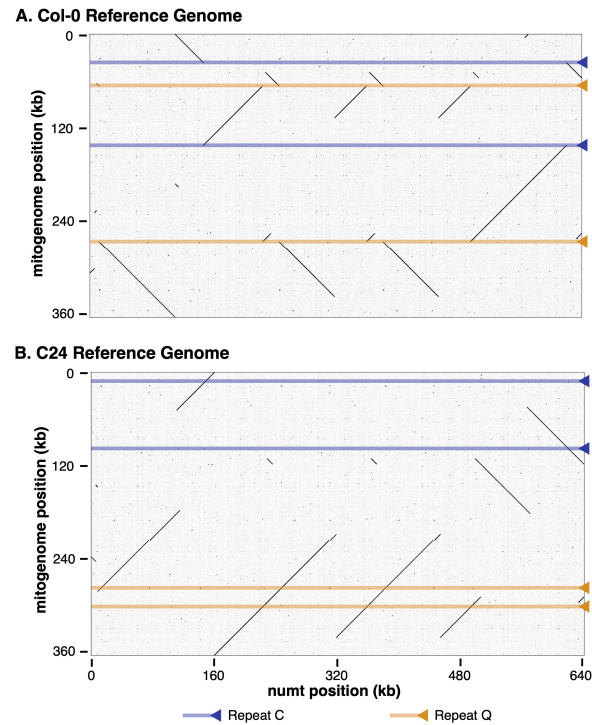

**Figure S1.** Dot plots comparing structure of the *A. thaliana* Chromosome 2 numt to the published reference mitogenomes for (A) *A. thaliana* Col-0 (NC\_037304.1) and (B) *A. thaliana* C24 (Y08501.2). Black diagonal lines indicate regions of conserved synteny between the numt and the corresponding mitogenome. The positions of the C and Q repeats in the mitogenome are highlighted in blue and orange, respectively. Note that these two repeats are associated with breaks in conserved synteny with the Col-0 mitogenome due to repeat-mediated recombination but not with the C24 mitogenome. Dot plots were generated with gepard v2.1.0 (Krumstiek, et al. 2007).

**Table S1.** SNVs that distinguish the numt in our *de novo* assembly of Col-CEN HiFi reads from the corresponding sequence in the published Col-XJTU assembly. Position numbering is relative to the telomere end of the numt in our *de novo* assembly.

**Table S2.** Variants that distinguish the numt in our *de novo* assembly of Col-CEN HiFi reads from our *de novo* assembly of the Col-XJTU HiFi reads. Position numbering is relative to the telomere end of the numt in the *de novo* Col-CEN assembly.

**Table S3.** Variants that distinguish the numt in our *de novo* assembly of Col-CEN HiFi reads from the reference Col-0 mitogenome (NC\_037304.1). Position numbering is relative to the telomere end of the numt.

**Table S4.** Pairs of sites in the 3-copy repeats that share a different allele than the mitogenome and the other repeat copy. Position numbering is relative to the telomere end of the numt.

**Table S5.** Variants that distinguish the numt in our *de novo* assembly of Col-CEN HiFi reads from the sequenced BACs in the original *Arabidopsis* genome project. Position numbering is relative to the telomere end of the numt.
